# Supplementary material for: Preparation of a flame-retardant waterborne polyurethane with core–shell structure and its application in a fire-resistant microfiber synthetic leather
Source: Royal Society of Chemistry journal article supplement (doi:10.1039/d4py00547c), 2024-01-01
Supplement: d4py00547c1.pdf [file d4py00547c1.pdf]

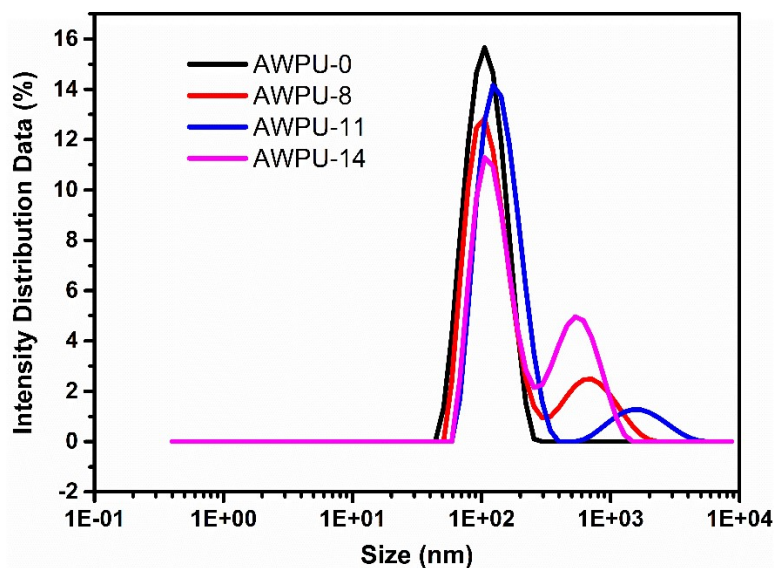

Figure S1 Particle size distribution of AWPU emulsions

Table S1 Properties of AWPU emulsions

| Samples | Z-Average(nm) | PDI   | Viscosity (mPa·s) | Zeta potential(mV) |
|---------|---------------|-------|-------------------|--------------------|
| AWPU-0  | 105.7         | 0.255 | 33.8 ± 0.2        | -39.4 ± 0.4        |
| AWPU-8  | 127.6         | 0.241 | 32.2 ± 0.4        | -37.9 ± 0.3        |
| AWPU-11 | 142.3         | 0.202 | 32.1 ± 0.3        | -36.7 ± 0.5        |
| AWPU-14 | 161.3         | 0.292 | 31.8 ± 0.2        | -31.1 ± 0.4        |

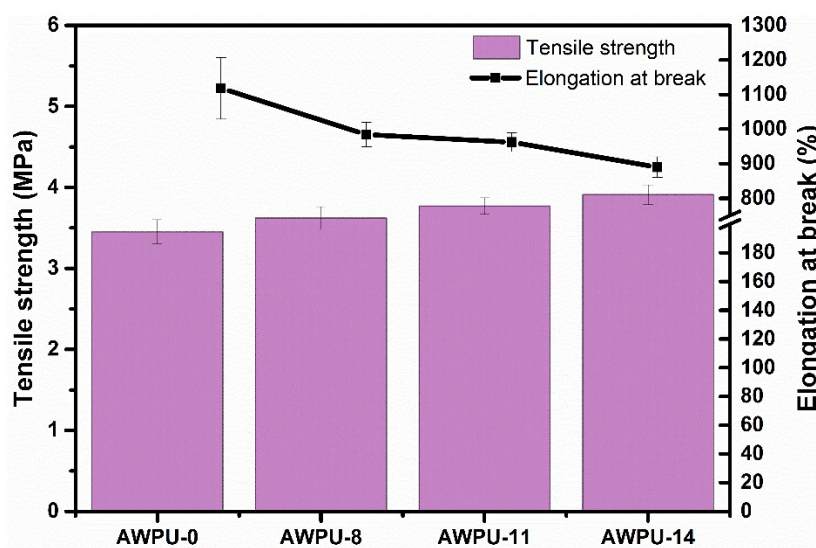

Figure S2 Mechanical properties of AWPU emulsions

Table S2 Strength and elongation at break data of microfiber leather

| Samples | Tensile strength (MPa) | Elongation at break (%) |
|---------|------------------------|-------------------------|
| Control | 12.48 ± 0.34           | 67.1 ± 1.1              |
| I       | 14.87 ± 0.29           | 69.0 ± 1.3              |
| II      | 13.33 ± 0.41           | 71.8 ± 1.2              |
| III     | 14.14 ± 0.32           | 72.1 ± 1.3              |
| IV      | 14.86 ± 0.35           | 75.4 ± 1.5              |
